# Supplementary material
Source: PubMed Central journal article supplement (PMC3338251)
Supplement: NIHMS363718-supplement-01.pdf [file NIHMS363718-supplement-01.pdf]

## **Supplemental Information**

### **Genetic Regulators of a Pluripotent Adult Stem Cell System in Planarians**

#### **Identified by RNAi and Clonal Analysis**

Daniel E. Wagner, Jaclyn J. Ho, and Peter W. Reddien

#### **Inventory of Supplemental Material:**

Figure S1 (Related to Figure 1)

Figure S2 (Related to Figure 2)

Figure S3 (Related to Figure 3)

Figure S4 (Related to Figure 4)

Figure S5 (Related to Figure 5)

Figure S6 (Related to Figure 6)

Table S1 (Related to Figure 1; *provided as a separate Excel spreadsheet*)

Table S2 (Related to Figure 1)

Table S3 (Related to Figure 2)

Table S4 (Related to Figure 3)

Table S5 (Related to Figure 4)

Supplemental Experimental Procedures

References

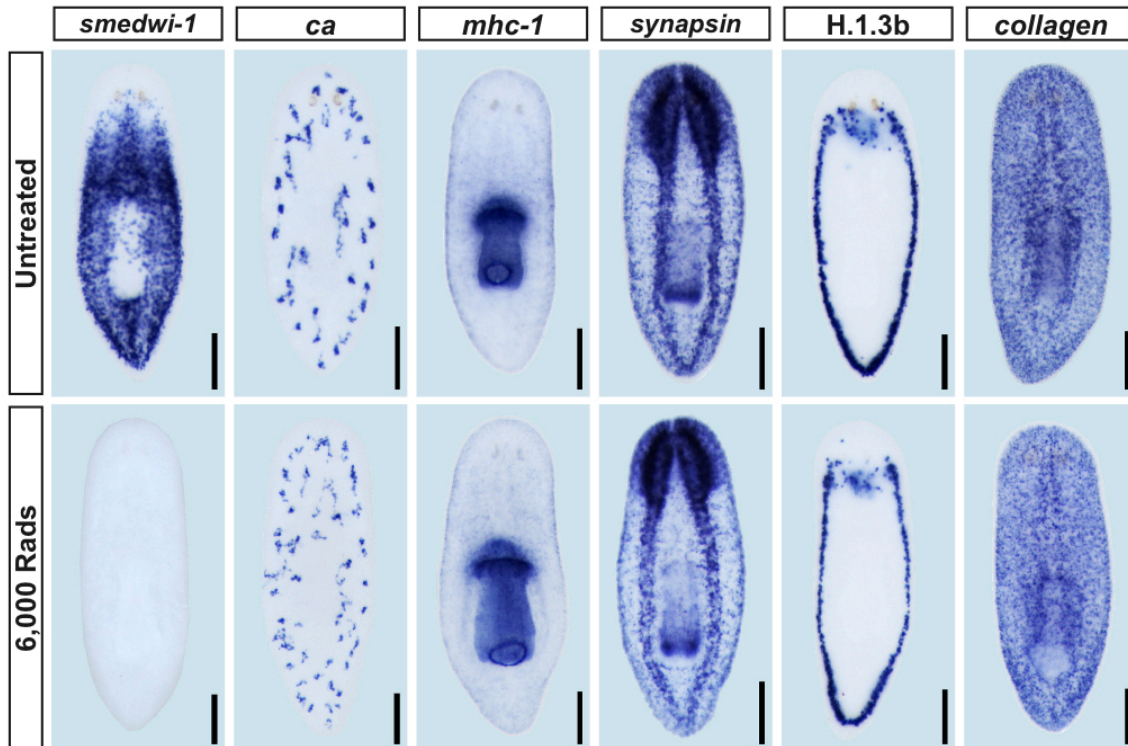

**Figure S1. *smewi-1*<sup>+</sup> proliferating cells are specifically depleted by  $\gamma$ -irradiation (Related to Figure 1)**

Whole-mount *in situ* hybridizations of untreated adult planarians and planarians fixed 5 days after exposure to 6,000 rads  $\gamma$ -irradiation. Effects of irradiation on proliferating cells (*smewi-1*), nephridic cells (*carbonic anhydrase / ca*), the muscular pharynx (*mhc-1*), the central nervous system (*synapsin*), and two distinct populations of subepidermal cells (H.1.3b and *collagen*) are shown. Animals are anterior up. Scale bars, 200  $\mu$ m.

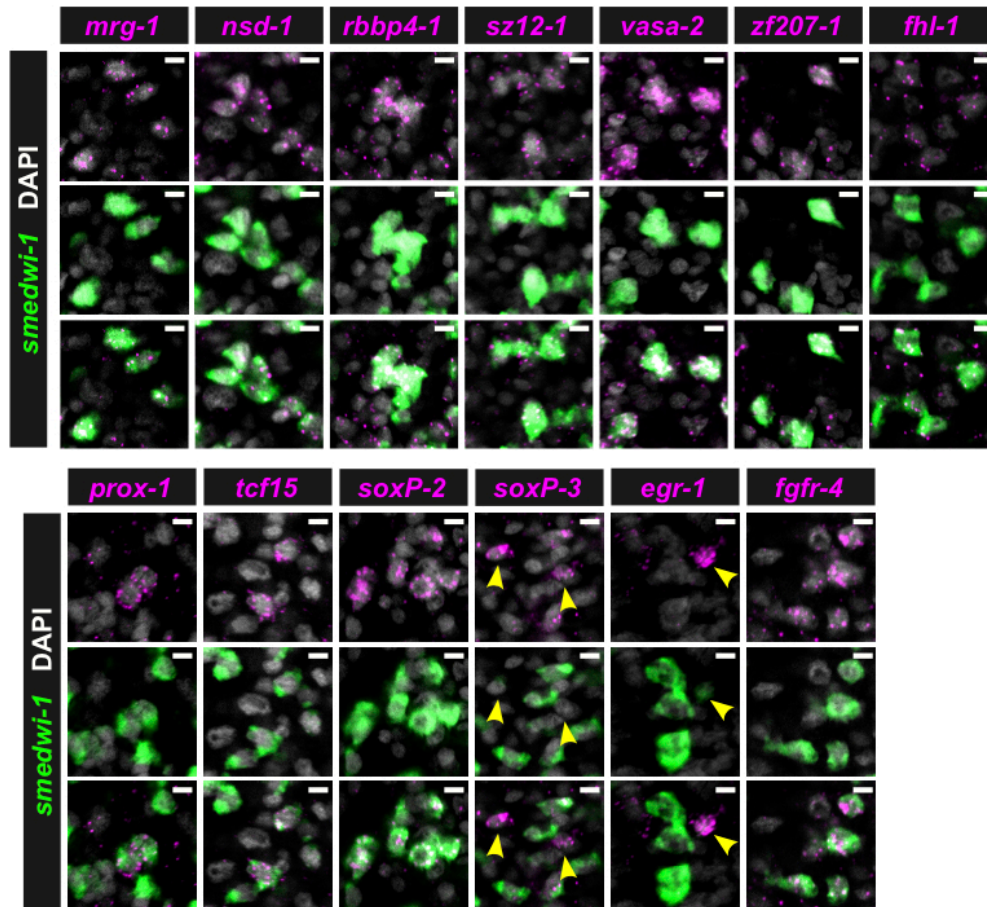

**Figure S2. Irradiation-sensitive transcripts are expressed in *smedwi-1*<sup>+</sup> proliferating cells (Related to Figure 2)**

Shown are additional genes identified by microarray, analyzed by double FISH with the gene *smedwi-1*. Most cells detected by FISH co-expressed *smedwi-1*; cells with little/no *smedwi-1* gene expression are labeled by arrowheads. Some transcripts (e.g., *mrg-1*, *rbbp4-1*, *vasa-2*, *zf207-1*, *fhl-1*, *fgfr-4*) are expressed at low levels with background signal (scattered magenta dots) also visible. Scale bars, 10  $\mu$ m.

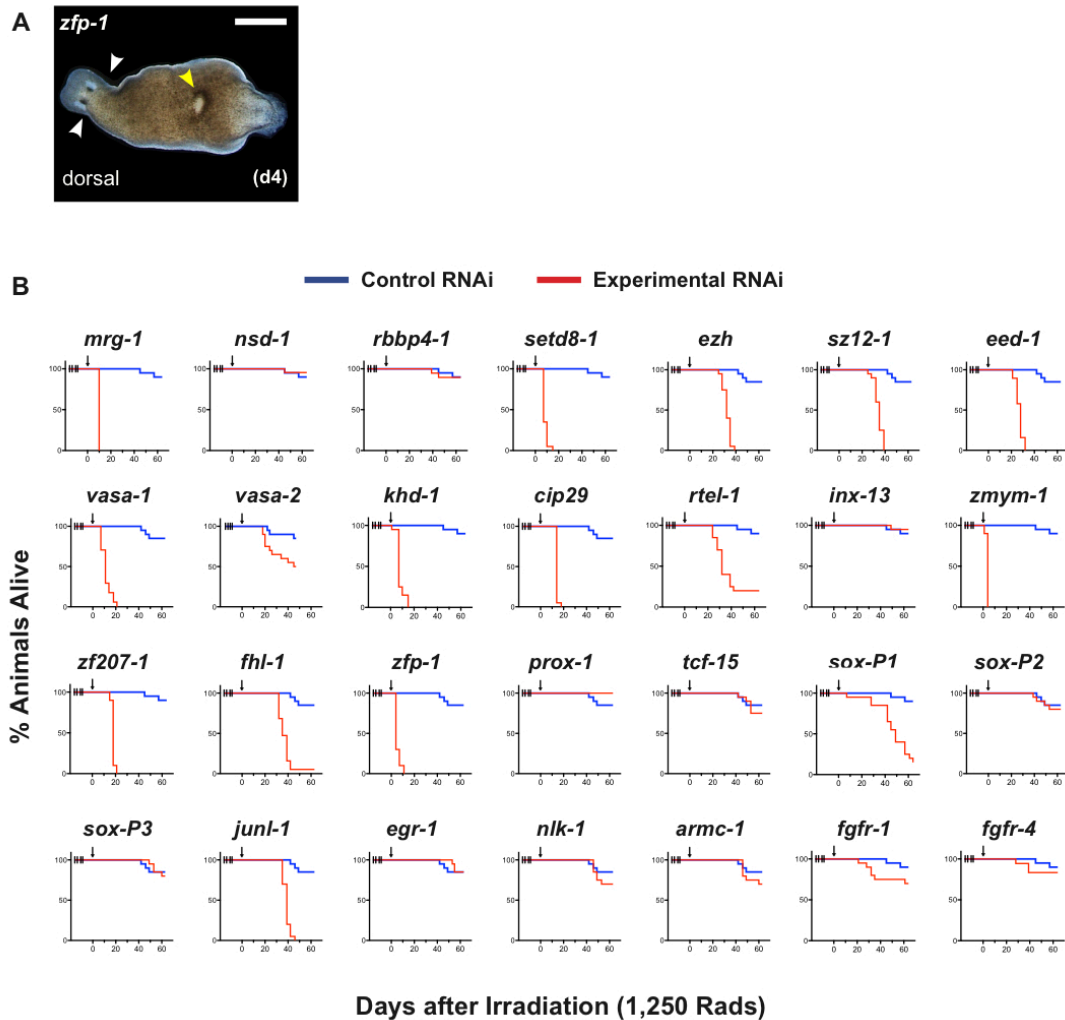

**Figure S3. Identification of RNAi phenotypes after sublethal irradiation (Related to Figure 3)**

(A) Representative dorsal view of a *zfp-1(RNAi)* animal 4 days after 1,250 rad exposure, anterior left. Animal is from the same experiment shown in Figure 3. In addition to ventral curling (Fig. 3E) and head regression (white arrowheads), *zfp-1(RNAi)* animals also developed dorsal epidermal lesions (yellow arrowhead). Scale bar, 500  $\mu$ m. (B) Survival curves for animals exposed to 1,250 rads of irradiation after RNAi. Animals are from the same experiment shown in Figure 3. Vertical lines indicate approximate times of RNAi feedings; arrows denote the time of irradiation (n = 17-21 animals per sample). See also Supplemental Table 4.

Figure S4. Analysis of colony RNAi phenotypes (Related to Figure 4)

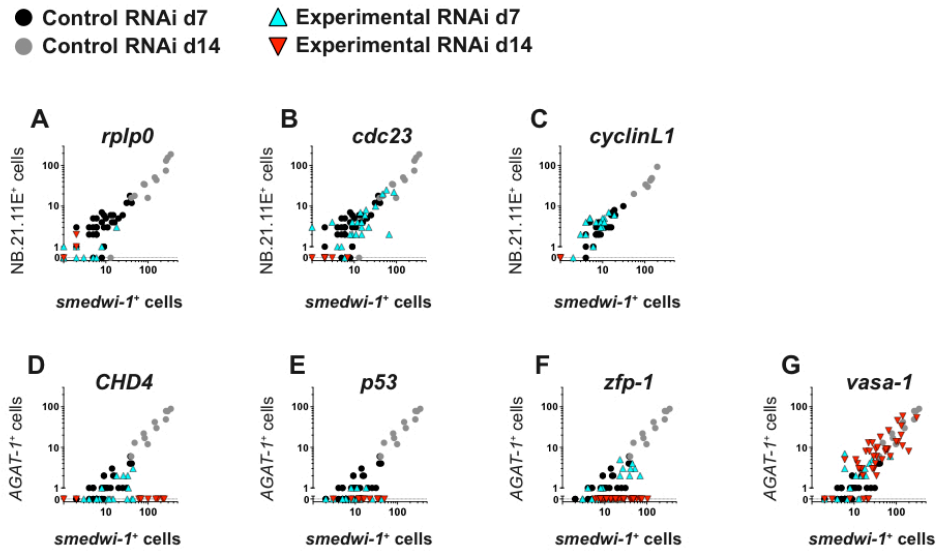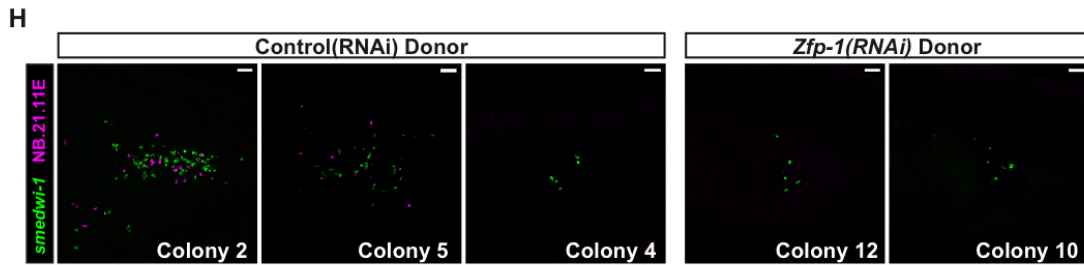

| Donor Cell Type    | Colony # | Transplant Type    | Time Before Fixation | # <i>smedwi-1</i> <sup>+</sup> cells | # NB.21.11E <sup>+</sup> cells |
|--------------------|----------|--------------------|----------------------|--------------------------------------|--------------------------------|
| Control(RNAi)      | 1        | bulk               | 10 Days              | 73                                   | 46                             |
|                    | 2        | single cell X1(FS) | 9 Days               | 81                                   | 27                             |
|                    | 3        | single cell X1(FS) | 9 Days               | 10                                   | 1                              |
|                    | 4        | single cell X1(FS) | 8 Days               | 10                                   | 0                              |
|                    | 5        | single cell X1(FS) | 8 Days               | 27                                   | 31                             |
| <i>Zfp-1(RNAi)</i> | 6        | bulk               | 10 Days              | 5                                    | 0                              |
|                    | 7        | bulk               | 10 Days              | 6                                    | 0                              |
|                    | 8        | single cell X1(FS) | 9 Days               | 2                                    | 0                              |
|                    | 9        | single cell X1(FS) | 9 Days               | 11                                   | 0                              |
|                    | 10       | single cell X1(FS) | 9 Days               | 15                                   | 0                              |
|                    | 11       | single cell X1(FS) | 9 Days               | 5                                    | 0                              |
|                    | 12       | single cell X1(FS) | 9 Days               | 15                                   | 0                              |
|                    | 13       | single cell X1(FS) | 8 Days               | 3                                    | 0                              |
|                    | 14       | single cell X1(FS) | 8 Days               | 3                                    | 0                              |

**Figure S4. Analysis of colony RNAi phenotypes (Related to Figure 4)**

(A-G) Additional plots of individual colony cell counts following RNAi. (H) Analysis of the *zfp-1*(RNAi) colony phenotype by transplantation of RNAi-exposed cNeoblasts into lethally irradiated (6,000 Rads) non-RNAi host animals. Donor animals were administered two feedings of control or *zfp-1* dsRNA over a seven-day period prior to transplantation. Host animals were irradiated 3 days prior to transplantation and fixed 8-10 days after transplantation. Representative confocal projections (anterior, left) of individual colonies produced by transplantation and labeled by double FISH are shown. Scale bars, 50  $\mu$ m. Shown is a table of *smedwi-1*<sup>+</sup> and NB.21.11E<sup>+</sup> cell counts for all colonies observed following transplantations. A total of 75 control(RNAi) and 72 *zfp-1*(RNAi) transplants (using either bulk macerated cell preps or individual cells) were performed in order to obtain the 14 colonies listed. 60% (3/5) of control(RNAi) colonies displayed large numbers of NB.21.11E<sup>+</sup> cells. By contrast, 0% (0/9) of *zfp-1*(RNAi) colonies displayed even a single NB.21.11E<sup>+</sup> cell. *zfp-1*(RNAi) colonies, furthermore, were much smaller than control(RNAi) colonies. These results suggest that both failed colony expansion and failed differentiation observed in *zfp-1*(RNAi) animals are due to requirement for *zfp-1* within cNeoblasts and/or their immediate descendants.

Figure S5. Phylogenetic analysis of planarian Sox genes

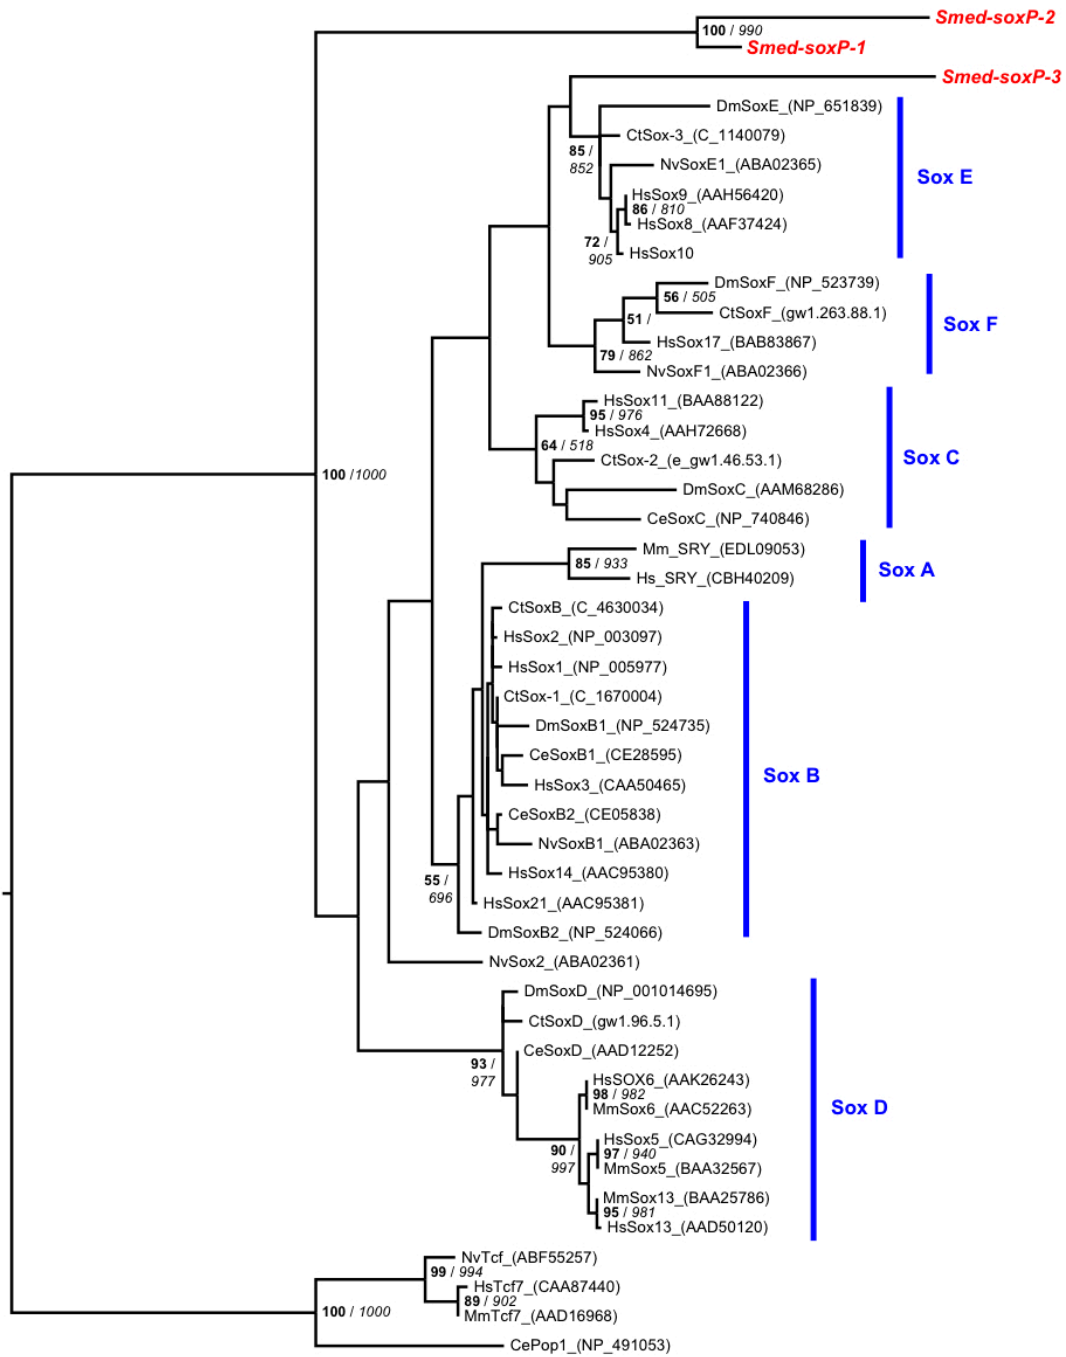

### **Figure S5. Phylogenetic analysis of planarian Sox genes**

Maximum likelihood and neighbor-joining analyses provide strong support for the *Schmidtea mediterranea* genes *Smed-soxP-1*, *Smed-soxP-2*, and *Smed-soxP-3* falling within the SRY-box (SOX) family of transcription factors. Sequences used in this analysis are well-established representatives of six families of Sox transcription factors SoxA-F. T-cell factor (Tcf) transcription factor sequences are used as an outgroup. Maximum likelihood bootstrap values greater or equal to 50 (50%) and neighbor-joining bootstrap values greater than 500 (50%) are indicated in bold and italics, respectively. This analysis did not generate strong support for *Smed-soxP-1*, *Smed-soxP-2*, or *Smed-soxP-3* belonging to any specific Sox families. Accession numbers for sequences used are listed in the tree. Mm, *Mus musculus*; Hs, *Homo sapiens*; Ce *Caenorhabditis elegans*; Dm, *Drosophila melanogaster*; Nv, *Nematostella vectensis*; Ct, *Capitella teleta*; Smed, *Schmidtea mediterranea*.



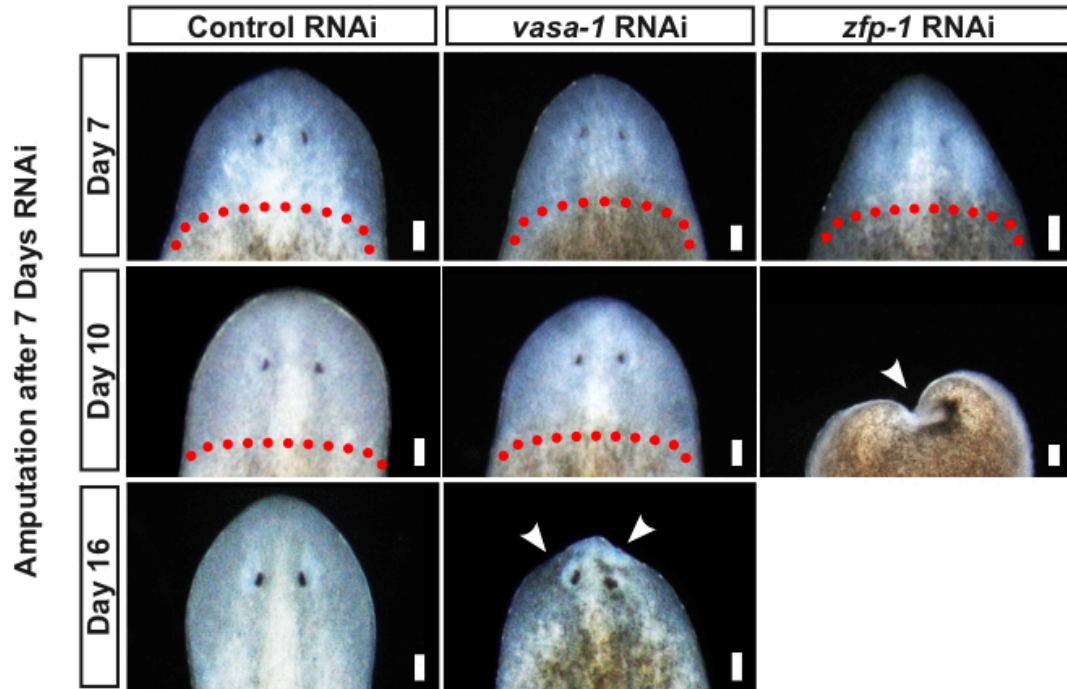

**Figure S6. Assessment of regeneration ability following *Smed-zfp-1* and *Smed-vasa-1* RNAi (Related to Figure 6)**

(A) Intact animals were fed RNAi food 4 times over 7 days prior to amputation. Shown are representative animal head regions from RNAi animals 7, 10, and 16 days following decapitation. Anterior, up (n = 20-30 amputated animals per sample). Red dots indicate approximate amputation plane. Successful formation of regenerative blastemas was followed by regression of head tissues (arrowheads). Scale bars, 100  $\mu$ m.

**Table S1. Expression profiles of genes differentially expressed 24 hours after 6,000 rads  $\gamma$ -irradiation (Related to Figure 1)**

***This table is provided as a separate Excel spreadsheet***

Statistical analysis of microarray data was performed with the limma package of Bioconductor (See Methods). Differentially expressed genes were designated based on comparisons between untreated and 24-hour irradiated samples; tabulated are 578 genes which displayed significant changes (fdr-adjusted  $p < 0.05$ ) and a two-fold or more change in expression. Shown are log<sub>2</sub>-transformed values of mean intensity ratios (irradiated/untreated) and adjusted p-values for all irradiation timepoints (6, 12, 24, and 48 hrs). 60-mer probes sequences (also listed) are based on annotated gene models. Shown are most similar *H. sapiens*, *M. musculus*, *D. melanogaster*, and *C. elegans* proteins, determined by BLASTx.

**Table S2. Gene set enrichment analysis (GSEA) of irradiation-sensitive transcripts**

| GO Category | GO Term                                                    | # of Genes | Enrichment Score (ES) | Normalized Enrichment Score (NES) | Nominal P-value | False Discovery Rate (FDR) |
|-------------|------------------------------------------------------------|------------|-----------------------|-----------------------------------|-----------------|----------------------------|
| BP          | DNA_REPLICATION                                            | 71         | -0.78647405           | -1.9618517                        | 0               | 0                          |
| BP          | DNA_DEPENDENT_DNA_REPLICATION                              | 41         | -0.7913672            | -1.9073597                        | 0               | 0                          |
| BP          | CHROMOSOME_ORGANIZATION_AND_BIOGENESIS                     | 85         | -0.7124289            | -1.8013581                        | 0               | 0.003185955                |
| BP          | DNA_METABOLIC_PROCESS                                      | 163        | -0.70437914           | -1.8040102                        | 0               | 0.003923937                |
| BP          | MEIOTIC_CELL_CYCLE                                         | 20         | -0.7973665            | -1.7849616                        | 0               | 0.004126123                |
| BP          | M_PHASE                                                    | 68         | -0.71268564           | -1.780008                         | 0               | 0.003602103                |
| BP          | ESTABLISHMENT_AND_OR_MAINTENANCE_OF_CHROMATIN_ARCHITECTURE | 56         | -0.7173133            | -1.769904                         | 0               | 0.004071353                |
| BP          | DNA_REPAIR                                                 | 87         | -0.6905502            | -1.7437253                        | 0               | 0.006157725                |
| BP          | DNA_RECOMBINATION                                          | 28         | -0.7382471            | -1.7314062                        | 0               | 0.008221576                |
| BP          | CELL_CYCLE_PROCESS                                         | 119        | -0.6747928            | -1.7122712                        | 0               | 0.010667152                |
| BP          | CELL_CYCLE_PHASE                                           | 104        | -0.67165273           | -1.7099036                        | 0               | 0.010057764                |
| BP          | RESPONSE_TO_DNA_DAMAGE_STIMULUS                            | 109        | -0.6726093            | -1.7082855                        | 0               | 0.0096307                  |
| BP          | CHROMOSOME_SEGREGATION                                     | 21         | -0.7447649            | -1.707657                         | 0.002066116     | 0.008966003                |
| BP          | MRNA_PROCESSING_GO_0006397                                 | 64         | -0.68561107           | -1.7063606                        | 0               | 0.008396816                |
| BP          | REGULATION_OF_DNA_METABOLIC_PROCESS                        | 30         | -0.7158175            | -1.6953417                        | 0               | 0.009876917                |
| BP          | REGULATION_OF_CYCLIN_DEPENDENT_PROTEIN_KINASE_ACTIVITY     | 20         | -0.7375845            | -1.6770225                        | 0.001037345     | 0.013271049                |
| BP          | RESPONSE_TO_ENDOGENOUS_STIMULUS                            | 130        | -0.6578717            | -1.674086                         | 0               | 0.013070003                |
| BP          | CHROMATIN_MODIFICATION                                     | 43         | -0.6880702            | -1.6725019                        | 0               | 0.012782617                |
| BP          | RNA_SPLICING_VIA_TRANSESTERIFICATION_REACTIONS             | 31         | -0.70018923           | -1.6618803                        | 0.001011122     | 0.014602413                |
| BP          | RNA_SPLICING                                               | 74         | -0.66738105           | -1.6607758                        | 0               | 0.014119196                |
| BP          | MRNA_METABOLIC_PROCESS                                     | 72         | -0.66198313           | -1.6589657                        | 0               | 0.013867962                |
| BP          | RNA_PROCESSING                                             | 139        | -0.6394601            | -1.6418678                        | 0               | 0.018167317                |
| BP          | CELL_CYCLE_GO_0007049                                      | 192        | -0.6288135            | -1.6317589                        | 0               | 0.02067871                 |
| BP          | MITOSIS                                                    | 53         | -0.6588593            | -1.6186252                        | 0               | 0.024749776                |
| BP          | DOUBLE_STRAND_BREAK_REPAIR                                 | 17         | -0.72717416           | -1.6144097                        | 0.00750268      | 0.025260521                |
| BP          | M_PHASE_OF_MITOTIC_CELL_CYCLE                              | 54         | -0.6580027            | -1.6089724                        | 0               | 0.02648995                 |
| BP          | CHROMATIN_ASSEMBLY_OR_DISASSEMBLY                          | 21         | -0.70598996           | -1.5996069                        | 0.003112033     | 0.028907608                |
| BP          | MITOTIC_CELL_CYCLE                                         | 98         | -0.62772375           | -1.5894548                        | 0               | 0.032034095                |
| BP          | DNA_INTEGRITY_CHECKPOINT                                   | 18         | -0.71956867           | -1.5862489                        | 0.006269592     | 0.032731045                |
| BP          | CELL_CYCLE_CHECKPOINT_GO_0000075                           | 30         | -0.66589314           | -1.5844908                        | 0               | 0.032594044                |
| BP          | HISTONE_MODIFICATION                                       | 22         | -0.69059443           | -1.5821396                        | 0.005197505     | 0.032687634                |
| BP          | CHROMATIN_REMODELING                                       | 17         | -0.7156775            | -1.5772376                        | 0.010626992     | 0.03394659                 |
| BP          | MICROTUBULE_CYTOSKELETON_ORGANIZATION_AND_BIOGENESIS       | 23         | -0.6905639            | -1.5750258                        | 0.003080082     | 0.03390448                 |
| BP          | COVALENT_CHROMATIN_MODIFICATION                            | 23         | -0.6858036            | -1.5667869                        | 0.004127967     | 0.037696093                |
| BP          | ANTI_APOPTOSIS                                             | 47         | -0.6382287            | -1.5638623                        | 0               | 0.03839632                 |
| BP          | RIBONUCLEOPROTEIN_COMPLEX_BIOGENESIS_AND_ASSEMBLY          | 68         | -0.6247947            | -1.5571553                        | 0               | 0.04103016                 |
| BP          | PROTEIN_DNA_COMPLEX_ASSEMBLY                               | 26         | -0.6513428            | -1.5402777                        | 0.011282051     | 0.04954915                 |
| MF          | STRUCTURAL_CONSTITUENT_OF_RIBOSOME                         | 69         | -0.71315175           | -1.7777117                        | 0               | 0.008807067                |
| MF          | CHROMATIN_BINDING                                          | 21         | -0.75098026           | -1.6877774                        | 0               | 0.039085653                |
| MF          | NUCLEOTIDYLTRANSFERASE_ACTIVITY                            | 35         | -0.69321775           | -1.6499338                        | 0               | 0.044717517                |
| MF          | ENDONUCLEASE_ACTIVITY                                      | 17         | -0.7450352            | -1.6628473                        | 0.001057082     | 0.045939174                |
| CC          | ACTIN_CYTOSKELETON                                         | 75         | -0.5865613            | -1.9644306                        | 0               | 0.001573409                |
| CC          | CELL_SURFACE                                               | 39         | -0.5873265            | -1.7604924                        | 0               | 0.015122602                |
| CC          | EXTRACELLULAR_MATRIX                                       | 48         | -0.55256414           | -1.7090467                        | 0.002547771     | 0.021118334                |
| CC          | PROTEINACEOUS_EXTRACELLULAR_MATRIX                         | 47         | -0.56286085           | -1.7621076                        | 0               | 0.022683902                |
| CC          | VESICLE                                                    | 78         | -0.5044195            | -1.6723069                        | 0               | 0.025404679                |
| CC          | EXTRACELLULAR_MATRIX_PART                                  | 32         | -0.59454244           | -1.7120501                        | 0.001333333     | 0.025796393                |
| CC          | ENDOPLASMIC_RETICULUM                                      | 184        | -0.4547668            | -1.6763616                        | 0               | 0.028210392                |
| CC          | COLLAGEN                                                   | 18         | -0.6398526            | -1.6351613                        | 0.004126547     | 0.030123707                |
| CC          | CYTOPLASMIC_VESICLE                                        | 75         | -0.49301866           | -1.6384537                        | 0               | 0.03198353                 |
| CC          | MEMBRANE_BOUND_VESICLE                                     | 74         | -0.49771395           | -1.6422218                        | 0.00120773      | 0.03484871                 |
| CC          | CYTOSKELETON                                               | 227        | -0.4358009            | -1.6122313                        | 0               | 0.03571381                 |
| CC          | MICROSOME                                                  | 23         | -0.56997657           | -1.565528                         | 0.016304348     | 0.03737842                 |
| CC          | ENDOPLASMIC_RETICULUM_PART                                 | 66         | -0.4815508            | -1.5696026                        | 0.003690037     | 0.0377254                  |
| CC          | CELL_CORTEX                                                | 26         | -0.5681521            | -1.5940422                        | 0.014844804     | 0.03854217                 |
| CC          | VESICULAR_FRACTION                                         | 23         | -0.56997657           | -1.5697169                        | 0.01615074      | 0.039840948                |
| CC          | CYTOPLASMIC_MEMBRANE_BOUND_VESICLE                         | 72         | -0.48943025           | -1.5942947                        | 0.001222494     | 0.04161096                 |
| CC          | ENDOPLASMIC_RETICULUM_MEMBRANE                             | 58         | -0.47691047           | -1.5254717                        | 0.011180124     | 0.041728713                |
| CC          | MEMBRANE_FRACTION                                          | 182        | -0.4294742            | -1.5705521                        | 0               | 0.041757077                |
| CC          | NUCLEAR_ENVELOPE_ENDOPLASMIC_RETICULUM_NETWORK             | 67         | -0.46944284           | -1.5259937                        | 0.008547009     | 0.04326511                 |
| CC          | CELL_FRACTION                                              | 243        | -0.41614917           | -1.5772883                        | 0               | 0.04370404                 |
| CC          | EXTRACELLULAR_REGION_PART                                  | 108        | -0.43462032           | -1.5107384                        | 0.004587156     | 0.044182397                |
| CC          | CELL_CORTEX_PART                                           | 16         | -0.6070221            | -1.5271928                        | 0.030428769     | 0.044469092                |
| CC          | VESICLE_MEMBRANE                                           | 20         | -0.592809             | -1.5705531                        | 0.01920439      | 0.044540882                |
| CC          | VACUOLE                                                    | 37         | -0.5254954            | -1.5392063                        | 0.014012739     | 0.0451661                  |
| CC          | ENDOSOME                                                   | 45         | -0.49883056           | -1.5440586                        | 0.012738854     | 0.04527182                 |
| CC          | CELL_PROJECTION                                            | 62         | -0.46599868           | -1.5113217                        | 0.007633588     | 0.045395                   |
| CC          | EXTRACELLULAR_REGION                                       | 135        | -0.42866713           | -1.5340794                        | 0.001135074     | 0.04547036                 |
| CC          | LYSOSOME                                                   | 34         | -0.522725             | -1.5135127                        | 0.025710419     | 0.04596842                 |
| CC          | LYTIC_VACUOLE                                              | 34         | -0.522725             | -1.5279459                        | 0.019430052     | 0.046144865                |
| CC          | CONTRACTILE_FIBER_PART                                     | 15         | -0.6101051            | -1.4963323                        | 0.036465637     | 0.04990748                 |

**Table S2. Gene set enrichment analysis (GSEA) of irradiation-sensitive transcripts (Related to Figure 1)**

Gene set enrichment analysis was performed with javaGSEA using default settings (see Methods). Listed are Biological Process (BP), Molecular Function (MF), and Cellular Component (CC) Gene Ontology gene sets significantly enriched (fdr-adjusted  $p < 0.05$ ) in a gene list pre-ranked by 24-hour microarray log<sub>2</sub> ratios (irradiated/untreated) and annotated by most similar (BLASTx) human symbol. Tabulated for each gene list are Gene Ontology (GO) term names, gene set size, enrichment scores, normalized enrichment scores, nominal p-value, and fdr-corrected p value. See Subramanian et al. (2005) for further details on the GSEA method.

**Table S3. Homology of genes expressed in proliferative cells of *Schmidtea mediterranea* (Related to Figure 2)**

| Gene Name            | Probe Base Name | Top Human BLASTx Hit (Gene Symbol) [E-value]                                          | Top Mouse BLASTx Hit [E-value]                                              | Top Fly BLASTx Hit [E-value]                | Top C.elegans BLASTx Hit [E-value]    | PFAM Domains [E-value]                                                             |
|----------------------|-----------------|---------------------------------------------------------------------------------------|-----------------------------------------------------------------------------|---------------------------------------------|---------------------------------------|------------------------------------------------------------------------------------|
| <i>Smed-mrg-1</i>    | SMED_31864_V2   | mortality factor 4 like 1 (MORF4L1) [1e-18]                                           | predicted gene, EG627352 [2e-19]                                            | MIRG15 [1e-28]                              | locus:mrg-1 [0.0001]                  | MIRG [6.6e-30]; Tudor-knot (chromodomain) [9.9e-09]                                |
| <i>Smed-nsd-1</i>    | SMED_20741_V2   | Wolf-Hirschhorn syndrome candidate 1 (WHSC1) [6e-24]                                  | Wolf-Hirschhorn syndrome candidate 1 (human) [5e-24]                        | CG1716 [6e-08]                              | locus:met-1 [1e-06]                   | SET [4.8e-06]                                                                      |
| <i>Smed-rbpd-1</i>   | SMED_02582_V2   | retinoblastoma binding protein 4 (RBBP4) [2e-71]                                      | retinoblastoma binding protein 4 [2e-71]                                    | Chromatin assembly factor 1 subunit [5e-71] | locus:lin-53 [1e-72]                  | WD40 [0.017; 6.1e-05; 1.3e-05; 1.6e-07; 8.9e-05]                                   |
| <i>Smed-eed-1</i>    | SMED_00806_V2   | embryonic ectoderm development (EED) [9e-82]                                          | embryonic ectoderm development [8e-82]                                      | esc [4e-80]                                 | locus:mes-6 [5e-17]                   | WD40 [0.0013; 0.00029]                                                             |
| <i>Smed-zfh</i>      | SMED_04593_V2   | enhancer of zeste homolog 1 (Drosophila) (EZH1) [3e-57]                               | enhancer of zeste homolog 1 (Drosophila) [1e-58]                            | Enhancer of zeste [7e-58]                   | locus:mes-2 [1e-24]                   | SET [1.7e-21]                                                                      |
| <i>Smed-sz12-1</i>   | SMED_28607_V2   | suppressor of zeste 12 homolog (Drosophila) (SUZ12) [6e-25]                           | suppressor of zeste 12 homolog (Drosophila) [6e-25]                         | Su(z)12 [1e-16]                             |                                       | VEFS_Box (of Polycomb protein) [2.7e-17]                                           |
| <i>Smed-setd8-1</i>  | SMED_06179_V2   | SET domain containing (lysine methyltransferase) 8 (SETD8) [4e-39]                    | SET domain containing (lysine methyltransferase) 8 [8e-39]                  | pr-set7 [8e-35]                             | locus:set-1 [1e-34]                   | SET [2.1e-18]                                                                      |
| <i>Smed-vasa-1</i>   | SMED_00256_V2   | DEAD (Asp-Glu-Ala-Asp) box polypeptide 4 (DDX4) [3e-111]                              | DEAD (Asp-Glu-Ala-Asp) box polypeptide 4 [4e-110]                           | vasa [5e-102]                               | locus:fat-1 [5e-97]                   | DEAD/DEAH box [9.6e-44]; Helicase (conserved C-terminal domain) [3.2e-28]          |
| <i>Smed-vasa-2</i>   | SMED_01829_V2   | DEAD (Asp-Glu-Ala-Asp) box polypeptide 4 (DDX4) [2e-100]                              | DEAD (Asp-Glu-Ala-Asp) box polypeptide 4 [1e-99]                            | vasa [3e-96]                                | locus:fat-1 [3e-86]                   | DEAD/DEAH box helicase [1.7e-44]; Helicase (conserved C-terminal domain) [8.8e-26] |
| <i>Smed-khd-1</i>    | SMED_01038_V2   | KH domain containing, RNA binding, signal transduction associated 2 (KHDRBSZ) [4e-27] | KH domain containing, RNA binding, signal transduction associated 2 [3e-27] | quaking related 58e-1 [8e-27]               | hypothetical protein E02D9.1c [2e-16] | KH_1 [0.00055]                                                                     |
| <i>Smed-cip29</i>    | SMED_10768_V2   | cytokine induced protein 29 kDa (CIP29) [1e-15]                                       | predicted gene, EG625193 [2e-15]                                            | CG8149 [5e-10]                              | status:Confirmed [1e-07]              | SAP [3.4e-12]                                                                      |
| <i>Smed-te11</i>     | SMED_13828_V2   | regulator of telomere elongation helicase 1 (RTEL1) [5e-38]                           | regulator of telomere elongation helicase 1 [2e-39]                         | CG4078 [1e-28]                              | CHL1 protein [5e-28]                  | DEAD 2 (RAD3-like DNA-binding helicase) [5.1e-46]                                  |
| <i>Smed-lnx-13</i>   | SMED_28576_V2   | pannexin 1 (PANX1) [0.025]                                                            | pannexin 1 [0.01]                                                           | innexin 2 [0.00002]                         | locus:eat-5 [7e-22]                   | innexin [2.9e-38]                                                                  |
| <i>Smed-znym-1</i>   | SMED_02942_V2   | zinc finger, MYM-type 2 (ZNF207) [8e-35]                                              | zinc finger, MYM-type 3 [4e-35]                                             | without children [1e-33]                    | locus:pro-1 [9e-07]                   | DUF3504 (unknown function) [3e-14]                                                 |
| <i>Smed-zn1207-1</i> | SMED_05644_V2   | zinc finger protein 207 (ZNF207) [1e-52]                                              | zinc finger protein 207 [8e-53]                                             | CG17912 [6e-54]                             | hypothetical protein B0035.1b [9e-45] | zf_C2H2_jaz [0.01]; zf_FCS [0.047]                                                 |
| <i>Smed-rlh-1</i>    | SMED_12559_V2   | four and a half LIM domains 3 (FHL3) [1e-56]                                          | four and a half LIM domains 5 [4e-60]                                       | Limpet [1e-39]                              | locus:lim-9 [1e-106]                  | LIM [2.6e-08; 1.4e-08; 1.1e-09; 1.8e-10; 1.4e-07]                                  |
| <i>Smed-prox-1</i>   | SMED_26251_V2   | prospero homeobox 1 (PROX1) [2e-28]                                                   | prospero homeobox 2 [5e-38]                                                 | prospero [4e-23]                            | locus:ceh-26 [3e-30]                  | Prox1 Homeobox [7.8e-13]                                                           |
| <i>Smed-tcf15</i>    | SMED_02941_V2   | scleraxis homolog A (mouse) (SCXA) [7e-14]                                            | transcription factor 15 [1e-13]                                             | cousin of atonal [5e-06]                    | locus:hjh-13 [9e-06]                  | HLH [3.6e-16]                                                                      |
| <i>Smed-soxP-1</i>   | SMED_11833_V2   | SRY (sex determining region Y)-box 13 (SOX13) [2e-13]                                 | SRY-box containing gene 13 [2e-13]                                          | Sox box protein 14 [5e-13]                  | locus:egl-13 [7e-13]                  | HMG_box [1.4e-12]                                                                  |
| <i>Smed-soxP-2</i>   | SMED_25793_V2   | SRY (sex determining region Y)-box 12 (SOX12) [1e-09]                                 | SRY-box containing gene 12 [1e-09]                                          | Sox100B [5e-10]                             | locus:egl-13 [4e-09]                  | HMG_box [2e-10]                                                                    |
| <i>Smed-soxP-3</i>   | SMED_05061_V2   | SRY (sex determining region Y)-box 9 (SOX9) [3e-18]                                   | SRY-box containing gene 9 [3e-18]                                           | Sox box protein 15 [9e-19]                  | locus:sem-2 [2e-18]                   | HMG_box [4.8e-19]                                                                  |
| <i>Smed-zfp-1</i>    | SMED_10510_V2   | zinc finger protein 701 (ZNF701) [1e-13]                                              | zinc finger protein 341 [3e-14]                                             | CG14710 [2e-12]                             | locus:pag-3 [3e-11]                   | zf_C2H2 [4.3e-06; 0.00021]                                                         |
| <i>Smed-junk-1</i>   | SMED_21705_V2   | transcription factor AP-1 (JUN) [0.0004]                                              | transcription factor AP-1 [0.0001]                                          | CG15040 [6e-06]                             | hypothetical protein T25F10.6 [2e-05] | Jun [0.00053]                                                                      |
| <i>Smed-egr-1</i>    | SMED_00244_V2   | early growth response 2 (Drosophila) (EGR2) [1e-25]                                   | early growth response 2 [1e-25]                                             | stripe [2e-25]                              | locus:egrh-1 [1e-24]                  | zf_C2H2 [0.00094; 0.0019]                                                          |
| <i>Smed-nlk-1</i>    | SMED_08795_V2   | nemo-like kinase (NLK) [3e-65]                                                        | nemo like kinase [2e-65]                                                    | nemo [1e-64]                                | locus:ilt-1 [1e-63]                   | PKinase [2.4e-29]                                                                  |
| <i>Smed-armc1</i>    | SMED_06686_V2   | armadillo repeat containing 1 (ARMC1) [1e-13]                                         | armadillo repeat containing 1 [4e-13]                                       | breathless [3e-32]                          | locus:egl-15 [7e-30]                  | no domains found                                                                   |
| <i>Smed-fgfr-1</i>   | SMED_38140_V2   | fibroblast growth factor receptor 1 (FGFR1) [9e-34]                                   | fibroblast growth factor receptor 1 [7e-34]                                 | breathless [7e-38]                          | locus:egl-15 [4e-30]                  | PKinase_Tyr [6.2e-23][1e-05]                                                       |
| <i>Smed-fgfr-4</i>   | SMED_38138_V2   | fibroblast growth factor receptor 4 (FGFR4) [2e-38]                                   | fibroblast growth factor receptor 4 [2e-37]                                 | breathless [7e-38]                          | locus:egl-15 [4e-30]                  | l-set (immunoglobulin l-set) [1e-05]; PKinase_Tyr [1.9e-25]                        |

**Table S3. Homology of genes expressed in proliferative cells of *Schmidtea mediterranea* (Related to Figure 2)**

Annotations for microarray candidate genes validated by *in situ* hybridization (Fig 2). Gene names, descriptions, and E-values are tabulated for top BLASTx matches of candidate genes in *H. sapiens*, *M. musculus*, *D. melanogaster*, and *C. elegans*. Protein domains identified by PFAM are also listed.

| Experiment                            | RNAi Condition                        | % of Total Animals          |                   | N   |
|---------------------------------------|---------------------------------------|-----------------------------|-------------------|-----|
|                                       |                                       | Visual Defects<br>by Day 21 | Dead by<br>Day 42 |     |
| I                                     | Control ( <i>unc-22</i> )             | 0%                          | 5%                | 20  |
|                                       | <i>bruli</i>                          | 100%                        | 100%              | 20  |
|                                       | <i>armac1</i>                         | 0%                          | 0%                | 20  |
|                                       | <i>cip29</i>                          | 100%                        | 100%              | 20  |
|                                       | <i>vasa-1</i>                         | 100%                        | 100%              | 17  |
|                                       | <i>egr-1</i>                          | 0%                          | 0%                | 20  |
|                                       | <i>fhl-1</i>                          | 53%                         | 95%               | 19  |
|                                       | <i>junl-1</i>                         | 95%                         | 95%               | 20  |
|                                       | <i>nlk-1</i>                          | 0%                          | 0%                | 20  |
|                                       | <i>prox-1</i>                         | 0%                          | 0%                | 20  |
|                                       | <i>tcf15</i>                          | 0%                          | 5%                | 20  |
|                                       | <i>soxP-3</i>                         | 10%                         | 0%                | 20  |
|                                       | <i>zfp-1</i>                          | 100%                        | 100%              | 20  |
|                                       | <i>ezh</i>                            | 100%                        | 100%              | 20  |
|                                       | <i>sz12-1</i>                         | 95%                         | 100%              | 20  |
|                                       | <i>eed-1</i>                          | 100%                        | 100%              | 19  |
| II                                    | Control ( <i>unc-22</i> )             | 0%                          | 0%                | 20  |
|                                       | Control ( <i>unc-22</i> ; 6,000 Rads) | 100%                        | 100%              | 19  |
|                                       | Control (No RNAi)                     | 0%                          | 0%                | 21  |
|                                       | <i>khd-1</i>                          | 100%                        | 100%              | 20  |
|                                       | <i>rbbp4-1</i>                        | 11%                         | 5%                | 19  |
|                                       | <i>zf207-1</i>                        | 100%                        | 100%              | 20  |
|                                       | <i>zmym-1</i>                         | 100%                        | 100%              | 20  |
|                                       | <i>inx-13</i>                         | 0%                          | 0%                | 20  |
|                                       | <i>rtef1</i>                          | 70%                         | 80%               | 20  |
|                                       | <i>nsd-1</i>                          | 0%                          | 0%                | 22  |
|                                       | <i>mrg-1</i>                          | 100%                        | 100%              | 20  |
|                                       | <i>setd8-1</i>                        | 100%                        | 100%              | 20  |
|                                       | <i>fgfr-1</i>                         | 95%                         | 25%               | 20  |
|                                       | <i>fgfr-2</i>                         | 44%                         | 17%               | 18  |
|                                       | <i>soxP-1</i>                         | 60%                         | 35%               | 20  |
|                                       | <i>soxP-2</i>                         | 20%                         | 5%                | 20  |
|                                       | <i>rplp0</i>                          | 100%                        | 100%              | 20  |
|                                       | <i>bruli</i>                          | 100%                        | 100%              | 20  |
|                                       | III                                   | Control ( <i>unc-22</i> )   | 60%               | 10% |
| Control ( <i>unc-22</i> ; 6,000 Rads) |                                       | 100%                        | 100%              | 20  |
| <i>vasa-2</i>                         |                                       | 90%                         | 45%               | 20  |

**Table S4. Identification of RNAi phenotypes after Sublethal Irradiation (1,250 Rads) (Related to Figure 3)**

Quantitative analysis of RNAi phenotypes identified after sublethal irradiation (See also Figs. 3 and S3). Listed are results for genes without major RNAi phenotypes, in addition to those depicted in Fig. 3. Percentages of animals showing visible defects in tissue homeostasis (e.g., head regression, ventral curling, lesions, or lysis) by day 21 post-irradiation are listed. Also listed are percentages of animals that died by day 42 post-irradiation. All other animals appeared normal, and showed no signs of tissue failure. Total numbers of animals analyzed per condition are also noted. Results for each RNAi condition should be compared to those of internal control samples. Control animals in Experiment III, for example, developed early signs of head regression and curling but subsequently recovered and nearly all survived past day 42 post-irradiation.

| RNAi condition  | Associated Control | Numbers of Cells per Colony               |        |               |                                            |        |                   |                                     |        |                   |                                      |        |                   | Analysis of Cell Type Ratios      |                   |
|-----------------|--------------------|-------------------------------------------|--------|---------------|--------------------------------------------|--------|-------------------|-------------------------------------|--------|-------------------|--------------------------------------|--------|-------------------|-----------------------------------|-------------------|
|                 |                    | # <i>smedwi-1</i> <sup>+</sup> cells (d7) |        |               | # <i>smedwi-1</i> <sup>+</sup> cells (d14) |        |                   | # NB.21.11E <sup>+</sup> cells (d7) |        |                   | # NB.21.11E <sup>+</sup> cells (d14) |        |                   | <i>smedwi-1</i> / NB.21.11E (d14) |                   |
|                 |                    | Mean                                      | St.Dev | t TEST        | Mean                                       | St.Dev | t TEST            | Mean                                | St.Dev | t TEST            | Mean                                 | St.Dev | t TEST            | Ratio of Means                    | ANCOVA            |
| <i>smedwi-2</i> | I                  | 10.8                                      | 9.5    | 0.6112        | n/a                                        | n/a    | n/a               | 3.2                                 | 2.8    | 0.1232            | n/a                                  | n/a    | n/a               | n/a                               | n/a               |
| <i>smedwi-3</i> | I                  | 13.1                                      | 12.7   | 0.8054        | 3.3                                        | 3.4    | <b>0.0008</b>     | 4.5                                 | 3.2    | 0.8299            | 0.9                                  | 1.5    | <b>0.0047</b>     | 3.8                               | 0.927             |
| <i>bruli</i>    | I                  | 9.6                                       | 6.0    | 0.2976        | 17.8                                       | 16.8   | <b>0.0016</b>     | 3.9                                 | 3.2    | 0.5091            | 4.1                                  | 4.0    | <b>0.0065</b>     | 4.3                               | 0.3702            |
| <i>CHD4</i>     | I                  | 21.1                                      | 14.9   | <b>0.0457</b> | 108.3                                      | 84.9   | 0.3039            | 3.8                                 | 2.5    | 0.3242            | 8.9                                  | 9.0    | <b>0.0107</b>     | 12.2                              | <b>&lt;0.0001</b> |
| <i>p53</i>      | I                  | 11.4                                      | 9.7    | 0.7650        | 19.9                                       | 13.8   | <b>0.0018</b>     | 0.0                                 | 0.0    | <b>&lt;0.0001</b> | 0.0                                  | 0.0    | <b>0.0044</b>     | undef                             | n/a               |
| <i>rpip0</i>    | I                  | 4.4                                       | 5.1    | <b>0.0025</b> | 1.7                                        | 0.6    | <b>0.0007</b>     | 0.5                                 | 0.9    | <b>&lt;0.0001</b> | 1.0                                  | 1.0    | <b>0.0048</b>     | 1.7                               | 0.9699            |
| <i>cdc23</i>    | I                  | 21.0                                      | 22.5   | 0.0958        | 2.8                                        | 2.1    | <b>0.0007</b>     | 5.9                                 | 7.0    | 0.4719            | 0.0                                  | 0.0    | <b>0.0044</b>     | undef                             | n/a               |
| <i>rpa1</i>     | II                 | 11.7                                      | 5.4    | 0.7942        | n/a                                        | n/a    | n/a               | 3.8                                 | 1.9    | 0.7719            | n/a                                  | n/a    | n/a               | n/a                               | n/a               |
| <i>cyclinL1</i> | II                 | 8.2                                       | 4.2    | 0.0889        | 1.0                                        | 0.0    | <b>0.0002</b>     | 3.8                                 | 1.7    | 0.8512            | 0.0                                  | 0.0    | <b>0.0022</b>     | undef                             | n/a               |
| <i>cip29</i>    | I                  | 13.1                                      | 9.5    | 0.7789        | 13.9                                       | 16.3   | <b>0.0013</b>     | 5.5                                 | 6.1    | 0.6181            | 2.1                                  | 2.7    | <b>0.0054</b>     | 6.6                               | 0.2905            |
| <i>soxP-1</i>   | I                  | 15.7                                      | 14.4   | 0.4999        | 57.3                                       | 28.4   | <b>0.0139</b>     | 4.2                                 | 4.1    | 0.7477            | 19.5                                 | 10.7   | <b>0.0310</b>     | 2.9                               | 0.142             |
| <i>fhl-1</i>    | I                  | 18.6                                      | 11.9   | <b>0.0426</b> | 34.1                                       | 35.8   | <b>0.0039</b>     | 4.4                                 | 3.7    | 0.7495            | 8.4                                  | 7.3    | <b>0.0101</b>     | 4.0                               | <b>0.02527</b>    |
| <i>zfp-1</i>    | I                  | 21.0                                      | 18.0   | 0.0514        | 26.3                                       | 22.9   | <b>0.0025</b>     | 1.7                                 | 3.2    | <b>0.0042</b>     | 0.02                                 | 0.2    | <b>0.0044</b>     | 1077.0                            | <b>&lt;0.0001</b> |
| <i>vasa-1</i>   | I                  | 16.5                                      | 17.6   | 0.4171        | 55.8                                       | 60.2   | <b>0.0132</b>     | 4.9                                 | 4.9    | 0.8725            | 10.8                                 | 16.1   | <b>0.0130</b>     | 5.1                               | <b>&lt;0.0001</b> |
| <i>setd8-1</i>  | III                | 8.8                                       | 5.2    | 0.7764        | n/a                                        | n/a    | n/a               | 3.0                                 | 2.3    | 0.6725            | n/a                                  | n/a    | n/a               | n/a                               | n/a               |
| <i>zmym-1</i>   | III                | 8.8                                       | 5.4    | 0.7828        | 3.2                                        | 1.5    | <b>&lt;0.0001</b> | 3.6                                 | 2.2    | 0.2018            | 0.8                                  | 0.8    | <b>&lt;0.0001</b> | 3.9                               | 0.917             |
| <i>khd-1</i>    | III                | 9.3                                       | 4.5    | 0.9678        | 19.3                                       | 12.4   | <b>&lt;0.0001</b> | 2.5                                 | 1.8    | 0.8447            | 3.6                                  | 3.4    | <b>&lt;0.0001</b> | 5.4                               | 0.1935            |
| <i>junl-1</i>   | IV                 | 5.3                                       | 1.6    | <b>0.0003</b> | 31.7                                       | 19.8   | <b>0.0009</b>     | 1.8                                 | 0.8    | <b>0.0016</b>     | 12.6                                 | 9.6    | <b>0.0006</b>     | 2.5                               | 0.4051            |
| <i>sz12-1</i>   | IV                 | 8.0                                       | 5.4    | 0.0381        | 45.7                                       | 40.7   | <b>0.0054</b>     | 3.6                                 | 1.5    | 0.1565            | 15.8                                 | 13.9   | <b>0.0019</b>     | 2.9                               | 0.8295            |
| <i>eed-1</i>    | IV                 | 9.1                                       | 5.5    | 0.0873        | 43.0                                       | 35.1   | <b>0.0041</b>     | 4.5                                 | 3.8    | 0.7529            | 20.9                                 | 20.1   | <b>0.0193</b>     | 2.1                               | 0.1181            |
| <i>ezh</i>      | V                  | 7.4                                       | 1.7    | 0.0501        | 31.6                                       | 16.8   | <b>&lt;0.0001</b> | 5.2                                 | 1.3    | 0.9176            | 11.4                                 | 6.5    | <b>&lt;0.0001</b> | 2.8                               | 0.2609            |
| control         | I                  | 12.3                                      | 10.7   |               | 152.8                                      | 112.4  |                   | 4.7                                 | 4.0    |                   | 63.9                                 | 61.9   |                   | 2.4                               |                   |
| control         | II                 | 11.2                                      | 6.7    |               | 128.4                                      | 43.7   |                   | 3.7                                 | 2.5    |                   | 45.1                                 | 23.4   |                   | 2.8                               |                   |
| control         | III                | 9.4                                       | 7.8    |               | 108.8                                      | 61.0   |                   | 2.6                                 | 2.2    |                   | 36.5                                 | 23.8   |                   | 3.0                               |                   |
| control         | IV                 | 12.5                                      | 8.7    |               | 111.8                                      | 66.6   |                   | 4.9                                 | 4.3    |                   | 43.3                                 | 24.3   |                   | 2.6                               |                   |
| control         | V                  | 11.2                                      | 8.5    |               | 105.3                                      | 66.1   |                   | 5.1                                 | 4.9    |                   | 54.5                                 | 38.9   |                   | 1.9                               |                   |

| RNAi condition | Associated Control | Numbers of Cells per Colony             |        |               |                                          |        |               | Analysis of Cell Type Ratios            |                   |
|----------------|--------------------|-----------------------------------------|--------|---------------|------------------------------------------|--------|---------------|-----------------------------------------|-------------------|
|                |                    | # <i>AGAT-1</i> <sup>+</sup> cells (d7) |        |               | # <i>AGAT-1</i> <sup>+</sup> cells (d14) |        |               | # <i>smedwi-1</i> / <i>AGAT-1</i> (d14) |                   |
|                |                    | Mean                                    | St.Dev | t TEST        | Mean                                     | St.Dev | t TEST        | Ratio of Means                          | ANCOVA            |
| <i>CHD4</i>    | I                  | 0.7                                     | 1.0    | 0.2291        | 0.0                                      | 0.0    | <b>0.0018</b> | n/a                                     | <b>&lt;0.0001</b> |
| <i>p53</i>     | I                  | 0.2                                     | 0.4    | <b>0.0010</b> | 0.0                                      | 0.0    | <b>0.0018</b> | n/a                                     | 0.0794            |
| <i>zfp-1</i>   | I                  | 1.2                                     | 1.5    | 0.8064        | 0.0                                      | 0.0    | <b>0.0018</b> | n/a                                     | <b>&lt;0.0001</b> |
| <i>vasa-1</i>  | I                  | 2.5                                     | 2.3    | 0.0547        | 11.0                                     | 13.8   | <b>0.0165</b> | 5.1                                     | <b>0.0077</b>     |
| control        | I                  | 1.1                                     | 1.4    |               | 36.4                                     | 30.9   |               | 4.2                                     |                   |

**Table S5. Statistical analysis of colony RNAi phenotypes (Related to Figure 4)**

For all quantitative clonal analyses, each experimental condition was compared to an internal RNAi control in which animals were cultured, irradiated, fixed, stained and analyzed in parallel. Tabulated are mean and standard deviations for *smedwi-1*<sup>+</sup>, NB.21.11E<sup>+</sup>, and *AGAT-1*<sup>+</sup> cell counts for all timepoints and RNAi conditions. Listed are p values from a Student's t-test (2-tailed) comparing cell counts at each timepoint to respective internal controls. Relative ratios of mean population sizes (per colony) were also assessed (see right). To determine whether cell type ratios significantly deviated from those of control colonies, linear regression together with analysis of covariance (ANCOVA, an f-test statistic) was performed using Graphpad Prism. Resulting p values are listed. Conditions in which no colony cells were present are denoted by "n/a". Tests resulting in significant differences from controls (p < 0.05) are highlighted in bold.



## Supplemental Experimental Procedures:

### Accession Numbers

Raw microarray data are deposited in GEO, accession number GSE34969. Full-length sequences of genes cloned for this study are deposited in Genbank, accession numbers JQ425133- JQ425160. Additional candidate genes with associated EST clone names and Genbank accession numbers are *Smed-rbbp4-1* (clone H.87.8a; accession number AY066201.1), *Smed-setd8-1* (accession numbers PL06004A2H08, PL06005A2B11, and PL06007A1C07), *Smed-khd-1* (H.62.2h; AY068551.1), *Smed-zmym-1* (SAAH-aaa29c01, EG409125.1), *Smed-znf207-1* (H.118.1c, AY067556.1), and *Smed-nlk-1* (H.118.1c, AY067556.1). Cell cycle genes with deposited RNAi clone names and accession numbers are *Smed-cyclinL1* (NBE.2.09B, AY967575.1), *Smed-rpA1* (NBE.6.12e, AY967663.1), *Smed-rplp0* (NBE.7.7g, AY967679.1), and *Smed-cdc23* (NBE.4.10b, AY967619.1). Accession numbers for additional genes used in this study are DQ186985.1 (*smedwi-1*), EG413862.1 (*mat*), EC616347 (*carbonic anhydrase / ca*), EC386316 (*mhc-1*), AY067773 (*synapsin*), AY067799 (H.1.3b), DN308230 (*collagen*).

### Microarray Analysis

Total RNA was harvested with Trizol (Invitrogen) from untreated animals and animals 6, 12, 24, and 48 hours after 6,000 rads  $\gamma$ -irradiation. Three biological replicates were used. Cy3 and Cy5-labeled cRNA was prepared using a QuickAmp labeling kit (Agilent) starting with 1 $\mu$ g total RNA. Custom planarian 60-mer 4x44,000 oligonucleotide expression arrays (Agilent) were hybridized according manufacturer instructions and scanned using an Agilent DNA microarray scanner. Array images were quantified and statistical significance of differential expression was calculated using Agilent's Feature Extraction Image Analysis software with the default two-color gene expression protocol. Agilent two-color arrays were within-array normalized by loess, followed by between-array quantile normalization of average intensities across channels (Aquantile). Differential expression analysis was performed with a moderated t-test, as implemented in the limma package of Bioconductor, with p-value correction by false discovery rate. Genes were considered differentially expressed if they met a corrected p-value threshold of 0.05 and displayed greater than two-fold change in expression ( $\log_2$  ratio > 1). Volcano plots were generated using R.

## **Gene Cloning**

Molecular clones of candidate gene sequences were obtained from existing EST libraries (Robb et al., 2007; Sánchez Alvarado et al., 2002) and by direct cloning from cDNA. cDNA libraries were generated with Superscript III reverse transcriptase (Invitrogen) from total RNA extracted (Trizol, Invitrogen) from mixed-stage regenerating animals. Gene-specific primers were designed from gene predictions and EST databases (Robb et al., 2007) and contained Gateway adapter sequences for downstream applications (see below). Amplicons generated by PCR were cloned into the pGEM vector (pGEM T-easy, Promega). In some cases, a second (nested) round of amplification was performed to obtain PCR products for cloning. Templates for RNA probe synthesis were generated by PCR using primers recognizing Gateway adapter sequences with a T7 promoter sequence appended to the reverse primer. For RNAi experiments, Gateway recombination (Invitrogen) was used to clone genes into the pPR244 vector, as described (Reddien et al., 2005a). For many genes, putative full-length transcripts were also assembled de novo from Illumina reads with the Trinity software package (Grabher et al., 2011) using default settings. Resulting contigs were mapped to the current version of the genome by BLAT and were compared to the Bowtie mapped reads to verify the assembly. Contigs for some genes were assembled from existing published EST sequences, or by performing 5' and 3' Race (FirstChoice RLM-RACE, Ambion).

## **Gene Set Enrichment Analysis**

GSEA was performed as described (Subramanian et al., 2005) using javaGSEA. A gene list annotated by top human BLASTx gene symbol and pre-ranked by log2 ratios (24 hour irradiated / untreated) was analyzed by Gene Ontology (GO) gene sets (GO:molecular function, GO:biological process, and GO:cellular component) using default settings. Gene sets were considered significantly enriched if they met an *fdr*-corrected p-value threshold of 0.05.

## **Phylogenetic Analysis**

Peptide sequences for *Smed-soxP-1*, *Smed-soxP-2*, *Smed-soxP-3* were aligned with well-known members of Sox family transcription factors using ClustalW with default settings (Thompson et. al., 1994). Alignments were trimmed using GBlocks (Castresana,

2000). Neighbor-joining trees were generated using ClustalW using default settings and 1,000 bootstrap replicates. Maximum likelihood analyses using 100 bootstrap replicates were run on each alignment using PhyML with WAG model of amino acid substitution, four substitution rate categories, and the proportion of invariable sites estimated from the dataset (Guindon and Gascuel, 2003). Maximum likelihood bootstrap values greater or equal to 50 (50%) and neighbor-joining bootstrap values greater than 500 (50%) are indicated in bold and italics, respectively.

### **Fluorescence-Activated Cell Sorting**

Tissue fragments were macerated in calcium-free, magnesium-free medium plus BSA (CMFB) as described (Reddien et al., 2005b) containing 1 mg/ml of collagenase for 45 minutes at RT. Tissues were passed through syringes with 25 gauge 5/8 inch needles and through a 40 µm cell-strainer cap (BD Biosciences). Cells were centrifuged at 1,250 rpm, 5 min, and resuspended in CMFB containing Hoechst 33342 (Invitrogen, 10 mg/ml) for 45 minutes at RT. Calcein (Invitrogen, 0.5 mg/ml) was incubated with the cells for 15 minutes at RT. 5 mg/ml propidium iodide was added to cells prior to flow cytometry. Sorts used a MoFlo3 FACS sorter. The X1 population (Hayashi et al., 2006) was assessed and quantified in triplicate using FlowJo software as described (Scimone et al., 2010).

### **Cell Transplantation**

Isolation and transplantation of bulk macerated cells and individual X1(FS) cells from RNAi donor animals into lethally irradiated hosts were performed as described (Wagner et al., 2011).

## Primers used for Gene Cloning

### *Smed-mrg-1*

For 5'-TGCCTCTGAAATCTGATATAAAG  
Nest 5'-CTATCACGGACCCTTGCTTT  
Rev 3'-ACATGGAACCGTAAATGCTG

### *Smed-nsd-1*

For 5'-ACATGCACGAAATGGTTTCA  
Rev 3'-TCCAATGCAAAAAGTGACAAA

### *Smed-eed-1*

For 5'-TCAATGATCGCATCCGTAAA  
Nest 5'-GTCTGATCCTATTTTATTCGTCTCC  
Rev 3'-GATCAAAGCGAGCAATCAGG

### *Smed-ezh*

For 5'-GATGACGTTTCGGCAAATCTT  
Nest 5'-TGAACAGATTGCAATGGTTAGT  
Rev 3'-TCGAATCAGTGCCGTTATTG

### *Smed-sz12-1*

For 5'-AAGTCACATAGCGTAGAATTTCAAGA  
Nest 5'-GCGGCACAAGACAAATCCTA  
Rev 3'-AGCCATTTTCATGCATTCGAG

### *Smed-setd8-1*

For 5'-TTTCTCCCAAAGAAAAGTTCTAAAAA  
Nest 5'-TATCAAATGAAATTCAGGCCAAAA  
Rev 3'-CAACAACAATAAAATACACAAAATCG

### *Smed-vasa-1*

For 5'-TGATGAAGAATGGGGAGCAT  
Nest 5'-CTCAAAAATGGCTTTGGCAGT  
Rev 3'-TCGAGCCATTCAGAAGTCG

### *Smed-vasa-2*

For 5'-CGGAGATTGAATAATGTAGTTAGCAA  
Rev 3'-CGATAAAATCCATAAAAAGATGCAC

### *Smed-cjp29*

For 5'-GTGGTATAATGGAGGACTTGACG  
Rev 3'-ATCTAGCAGCGCGAGCTT

### *Smed-rtel1*

For 5'-TTTTCCATTCGAACCTTATGC  
Nest 5'-TGCCAAATAATATACATGGAAAAA  
Rev 3'-TCCATGTCCAATTTTCAGAGTTTC

### *Smed-inx13*

For 5'-TGATAGCTTCTGAATTGCTTTCTT  
Nest 5'-AATGGATTCTCTGTGCTCAA  
Rev 3'-GGTCGGTTTGAGGTTTTTCAG

### *Smed-fhl-1*

For 5'-ATAAAATGGCCTTGAACAAGA  
Nest 5'-AATTGTACAGGTTTTAAAATTCATGG  
Rev 3'-AACTGCTGCAATTGGGACAC

### *Smed-prox-1*

For 5'-TAAAGTCAGCCGGAATAGCA  
Nest 5'-TCCAAAAATGAATTCACCACA  
Rev 3'-ACTCTGGCAACATCTGATCG

### *Smed-tcf15*

For 5'-GCAAAAAGAACGCGAAAGGT  
Rev 3'-TATACAAAAGGCAACGAAATGC

### *Smed-soxP-1*

For 5'-AAGACAAATGCAACACAATCAAA  
Nest 5'-TACTTTGAAATTATGGATGGTCCATT  
Rev 3'-TGTTGAAATAATGAATTAAGATTTGG

### *Smed-soxP-2*

For 5'-GCTTCAAATTCAGAAATAAGCAAA  
Nest 5'-GGAATAACATTCCAGCTACCATT  
Rev 3'-GCAACCATGAAAATCGCTTC

### *Smed-soxP-3*

For 5'-TTGTTGAGCATGTTTCTAAATACTC  
Nest 5'-TGAATTATTGTGAAAACACCGAAA  
Rev 3'-AAATCAAACACTACAAAACAATTCATGT

### *Smed-zfp-1*

For 5'-GAATTTTCATGGAACAAAATAATTCA  
Nest 5'-CATCAACTACTCCATTCTCATTGG  
Rev 3'-ACGTCCATGGAGTCAGTTGG

### *Smed-jun1-1*

For 5'-AATCGGAATTCGGTATTTTGG  
Nest 5'-AAATGCTCTCAGACCCGATT  
Rev 3'-TTGAAAAACAAGCGAATTTGG

### *Smed-egr-1*

For 5'-CGAGACTGCTAATGATGATCCA  
Nest 5'-CATCGTTTGAGGTTTCATTTCG  
Rev 3'-TGGCAATATTTGCAGTCATGT

### *Smed-armc1*

For 5'-AATGTCTCTTAATCCGCTGTCTG  
Nest 5'-CGGTTGTTAGGCCAGGATT  
Rev 3'-TTTTCAAGGTCCTTTTGTGAAA

### *Smed-fgfr-1*

For 5'-TGGAATGTTTCGATTTTCCATC  
Nest 5'-CTGTACGATGGGCTTGTTTT  
Rev 3'-TCAACCAACTGGAAAGTGTGA

### *Smed-fgfr-4*

For 5'-ACATGCATCCAGAAATGAAGAA  
Nest 5'-GATGTGCATGGTGAAGTTG  
Rev 3'-CACTGAAAATCGGCCCTCATT

## References:

- Castresana, J. (2000). Selection of conserved blocks from multiple alignments for their use in phylogenetic analysis. *Mol Biol Evol* 17, 540-552.
- Guindon, S., and Gascuel, O. (2003). A simple, fast, and accurate algorithm to estimate large phylogenies by maximum likelihood. *Syst Biol* 52, 696-704.
- Grabherr, M. G., Haas, B. J., Yassour, M., Levin, J. Z., Thompson, D. A., Amit, I., Adiconis, X., Fan, L., Raychowdhury, R., Zeng, Q., et al. (2011). Full-length transcriptome assembly from RNA-Seq data without a reference genome. *Nat Biotechnol* 29, 644–652.
- Hayashi, T., Asami, M., Higuchi, S., Shibata, N., and Agata, K. (2006). Isolation of planarian X-ray-sensitive stem cells by fluorescence-activated cell sorting. *Dev Growth Differ* 48, 371-380.
- Reddien, P., Bermange, A., Murfitt, K., Jennings, J., and Sánchez Alvarado, A. (2005a). Identification of genes needed for regeneration, stem cell function, and tissue homeostasis by systematic gene perturbation in planaria. *Dev Cell* 8, 635-649.
- Reddien, P.W., Oviedo, N.J., Jennings, J.R., Jenkin, J.C., and Sánchez Alvarado, A. (2005b). SMEDWI-2 is a PIWI-like protein that regulates planarian stem cells. *Science* 310, 1327-1330.
- Robb, S.M.C., Ross, E., and Sánchez Alvarado, A. (2007). SmedGD: the *Schmidtea mediterranea* genome database. *Nucleic Acids Research* 36, D599-D606.
- Sánchez Alvarado, A., Newmark, P.A., Robb, S.M., and Juste, R. (2002). The *Schmidtea mediterranea* database as a molecular resource for studying Platyhelminthes, stem cells and regeneration. *Development* 129, 5659-5665.
- Scimone, M.L., Meisel, J., and Reddien, P.W. (2010). The Mi-2-like *Smed-CHD4* gene is required for stem cell differentiation in the planarian *Schmidtea mediterranea*. *Development* 137, 1231-1241.
- Subramanian, A., Tamayo, P., Mootha, V.K., Mukherjee, S., Ebert, B.L., Gillette, M.A., Paulovich, A., Pomeroy, S.L., Golub, T.R., Lander, E.S., et al. (2005). Gene set enrichment analysis: a knowledge-based approach for interpreting genome-wide expression profiles. *Proc Natl Acad Sci USA* 102, 15545-15550.
- Thompson, J.D., Higgins, D.G., and Gibson, T.J. (1994). CLUSTAL W: improving the sensitivity of progressive multiple sequence alignment through sequence weighting, position-specific gap penalties and weight matrix choice. *Nucleic Acids Res* 22, 4673-4680.
- Wagner, D. E., Wang, I. E., and Reddien, P. W. (2011). Clonogenic neoblasts are pluripotent adult stem cells that underlie planarian regeneration. *Science* 332, 811–816.
